# Supplementary material for: Lower Social Support is Associated with Accelerated Epigenetic Aging: Results from the Health and Retirement Study
Source: bioRxiv or medRxiv preprint supplement (doi:10.1101/2022.06.03.22275977), 2022-06-04
Supplement: Supplementary file [file media-1.pdf]

## Supplemental Information

Table 1

Generalized linear models with spousal support predicting epigenetic aging.

| Models                             | Horvath  |           |               | Hannum   |           |               | PhenoAge     |             |                     | GrimAge      |             |                     | Dunedin PoAm  |              |                       |
|------------------------------------|----------|-----------|---------------|----------|-----------|---------------|--------------|-------------|---------------------|--------------|-------------|---------------------|---------------|--------------|-----------------------|
|                                    | <i>B</i> | <i>SE</i> | <i>95% CI</i> | <i>B</i> | <i>SE</i> | <i>95% CI</i> | <i>B</i>     | <i>SE</i>   | <i>95% CI</i>       | <i>B</i>     | <i>SE</i>   | <i>95% CI</i>       | <i>B</i>      | <i>SE</i>    | <i>95% CI</i>         |
| 1. Support with spouse             | 0.03     | 0.23      | -0.43, 0.49   | -0.38    | 0.18      | -0.75, -0.01  | <b>-0.61</b> | <b>0.25</b> | <b>-1.11, -0.11</b> | <b>-0.34</b> | <b>0.12</b> | <b>-0.59, -0.09</b> | <b>-0.008</b> | <b>0.003</b> | <b>-0.015, -0.002</b> |
| Age                                | 0.76     | 0.02      | 0.72, 0.79    | 0.80     | 0.01      | 0.77, 0.82    | 0.79         | 0.02        | 0.74, 0.83          | 0.78         | 0.01        | 0.76, 0.80          | 0.001         | 0.000        | 0.000, 0.001          |
| Female sex                         | -0.69    | 0.28      | -1.25, -0.13  | -1.82    | 0.24      | -2.30, -1.33  | -1.12        | 0.38        | -1.89, -0.35        | -3.25        | 0.24        | -3.73, -2.77        | -0.020        | 0.004        | -0.029, -0.011        |
| Race/ethnicity                     |          |           |               |          |           |               |              |             |                     |              |             |                     |               |              |                       |
| Non-Hispanic Black                 | 0.27     | 0.50      | -0.73, 1.27   | -1.52    | 0.44      | -2.40, -0.64  | 0.65         | 0.69        | -0.74, 2.04         | 1.68         | 0.34        | 1.00, 2.37          | 0.028         | 0.009        | 0.011, 0.046          |
| Hispanic                           | -1.33    | 0.55      | -2.43, -0.23  | 0.06     | 0.36      | -0.65, 0.77   | -0.06        | 0.39        | -0.85, 0.72         | 0.17         | 0.36        | -0.55, 0.89         | 0.009         | 0.008        | -0.007, 0.025         |
| Non-Hispanic other race            | 0.85     | 0.65      | -0.47, 2.16   | -0.30    | 0.52      | -1.35, 0.74   | -0.47        | 1.03        | -2.53, 1.60         | -0.08        | 0.60        | -1.28, 1.13         | 0.021         | 0.015        | -0.010, 0.052         |
| <i>N</i> = 2,714                   |          |           |               |          |           |               |              |             |                     |              |             |                     |               |              |                       |
| 2. Support with spouse             | 0.03     | 0.22      | -0.42, 0.47   | -0.34    | 0.17      | -0.69, 0.01   | -0.53        | 0.25        | -1.03, -0.03        | -0.10        | 0.12        | -0.35, 0.15         | -0.005        | 0.003        | -0.011, 0.002         |
| Age                                | 0.77     | 0.02      | 0.73, 0.81    | 0.80     | 0.01      | 0.78, 0.83    | 0.80         | 0.02        | 0.75, 0.84          | 0.81         | 0.01        | 0.79, 0.83          | 0.001         | 0.000        | 0.001, 0.002          |
| Female sex                         | -0.56    | 0.26      | -1.08, -0.04  | -1.77    | 0.25      | -2.28, -1.26  | -1.00        | 0.41        | -1.82, -0.17        | -2.78        | 0.21        | -3.20, -2.37        | -0.013        | 0.004        | -0.021, -0.006        |
| Race/ethnicity                     |          |           |               |          |           |               |              |             |                     |              |             |                     |               |              |                       |
| Non-Hispanic Black                 | 0.31     | 0.51      | -0.72, 1.33   | -1.64    | 0.47      | -2.58, -0.69  | 0.44         | 0.73        | -1.03, 1.92         | 1.19         | 0.33        | 0.52, 1.87          | 0.021         | 0.008        | 0.005, 0.038          |
| Hispanic                           | -1.22    | 0.53      | -2.29, -0.15  | -0.10    | 0.40      | -0.91, 0.70   | -0.54        | 0.46        | -1.46, 0.38         | -0.47        | 0.33        | -1.13, 0.20         | 0.001         | 0.008        | -0.016, 0.018         |
| Non-Hispanic other race            | 0.96     | 0.65      | -0.37, 2.28   | -0.33    | 0.54      | -1.42, 0.76   | -0.40        | 0.94        | -2.31, 1.51         | 0.26         | 0.57        | -0.90, 1.41         | 0.026         | 0.015        | -0.005, 0.056         |
| Educational attainment             |          |           |               |          |           |               |              |             |                     |              |             |                     |               |              |                       |
| Less than high school              | -0.63    | 0.42      | -1.48, 0.22   | 0.02     | 0.44      | -0.86, 0.90   | 0.99         | 0.64        | -0.29, 2.28         | 1.73         | 0.27        | 1.19, 2.28          | 0.020         | 0.006        | 0.008, 0.032          |
| High school diploma/GED            | -0.23    | 0.36      | -0.97, 0.51   | 0.04     | 0.29      | -0.54, 0.62   | 0.25         | 0.46        | -0.68, 1.18         | 1.15         | 0.23        | 0.69, 1.62          | 0.011         | 0.005        | 0.002, 0.021          |
| Some college                       | -0.41    | 0.41      | -1.23, 0.42   | -0.30    | 0.34      | -0.99, 0.40   | 0.25         | 0.40        | -0.55, 1.06         | 0.94         | 0.27        | 0.41, 1.48          | 0.009         | 0.005        | -0.002, 0.019         |
| BMI category                       |          |           |               |          |           |               |              |             |                     |              |             |                     |               |              |                       |
| Overweight ( $\geq 25$ to $< 30$ ) | -0.35    | 0.38      | -1.11, 0.42   | -0.19    | 0.34      | -0.87, 0.49   | -0.32        | 0.46        | -1.24, 0.61         | 0.13         | 0.24        | -0.36, 0.61         | -0.001        | 0.005        | -0.010, 0.009         |
| Obese I ( $\geq 30$ to $< 35$ )    | 0.43     | 0.42      | -0.41, 1.28   | 0.41     | 0.36      | -0.31, 1.13   | 0.48         | 0.44        | -0.42, 1.38         | 0.80         | 0.28        | 0.24, 1.37          | 0.009         | 0.004        | 0.000, 0.018          |
| Obese II ( $\geq 35$ )             | 1.04     | 0.54      | -0.04, 2.13   | 1.11     | 0.37      | 0.36, 1.87    | 1.39         | 0.59        | 0.20, 2.57          | 1.76         | 0.26        | 1.23, 2.28          | 0.032         | 0.006        | 0.020, 0.045          |
| Smoking status                     |          |           |               |          |           |               |              |             |                     |              |             |                     |               |              |                       |
| Current                            | 0.01     | 0.59      | -1.18, 1.20   | 0.58     | 0.43      | -0.29, 1.44   | 1.16         | 0.63        | -0.11, 2.43         | 7.25         | 0.32        | 6.60, 7.89          | 0.125         | 0.008        | 0.108, 0.142          |
| Former                             | 0.38     | 0.31      | -0.23, 1.00   | 0.11     | 0.26      | -0.41, 0.64   | 0.26         | 0.30        | -0.34, 0.87         | 1.94         | 0.16        | 1.62, 2.26          | 0.027         | 0.004        | 0.020, 0.035          |
| Alcohol use                        |          |           |               |          |           |               |              |             |                     |              |             |                     |               |              |                       |
| 1-4 drinks per day                 | -0.13    | 0.34      | -0.82, 0.55   | -0.32    | 0.25      | -0.84, 0.19   | -0.05        | 0.39        | -0.83, 0.74         | -0.24        | 0.16        | -0.57, 0.09         | -0.004        | 0.004        | -0.011, 0.004         |
| 5+ drinks per day                  | 1.86     | 1.11      | -0.39, 4.10   | 0.85     | 0.75      | -0.66, 2.36   | 2.38         | 0.85        | 0.65, 4.10          | 1.51         | 0.72        | 0.07, 2.96          | 0.005         | 0.013        | -0.021, 0.031         |
| <i>N</i> = 2,714                   |          |           |               |          |           |               |              |             |                     |              |             |                     |               |              |                       |

Note. PoAm = Pace of Aging methylation; *CI* = confidence interval. Bold font denotes statistically significant association following false discovery rate correction.

Table 2

Generalized linear models with spousal strain predicting epigenetic aging.

| Models                             | Horvath  |           |               | Hannum   |           |               | PhenoAge |           |               | GrimAge  |           |               | Dunedin PoAm |           |                |
|------------------------------------|----------|-----------|---------------|----------|-----------|---------------|----------|-----------|---------------|----------|-----------|---------------|--------------|-----------|----------------|
|                                    | <i>B</i> | <i>SE</i> | <i>95% CI</i> | <i>B</i> | <i>SE</i> | <i>95% CI</i> | <i>B</i> | <i>SE</i> | <i>95% CI</i> | <i>B</i> | <i>SE</i> | <i>95% CI</i> | <i>B</i>     | <i>SE</i> | <i>95% CI</i>  |
| 1. Strain with spouse              | 0.01     | 0.22      | -0.43, 0.46   | 0.35     | 0.14      | 0.06, 0.63    | 0.17     | 0.21      | -0.26, 0.60   | -0.15    | 0.14      | -0.42, 0.13   | 0.003        | 0.003     | -0.003, 0.010  |
| Age                                | 0.76     | 0.02      | 0.72, 0.80    | 0.80     | 0.01      | 0.77, 0.83    | 0.79     | 0.02      | 0.75, 0.83    | 0.78     | 0.01      | 0.76, 0.80    | 0.001        | 0.000     | 0.000, 0.001   |
| Female sex                         | -0.69    | 0.28      | -1.24, -0.13  | -1.73    | 0.24      | -2.21, -1.26  | -1.01    | 0.38      | -1.78, -0.24  | -3.21    | 0.23      | -3.67, -2.74  | -0.018       | 0.005     | -0.027, -0.009 |
| Race/ethnicity                     |          |           |               |          |           |               |          |           |               |          |           |               |              |           |                |
| Non-Hispanic Black                 | 0.22     | 0.52      | -0.82, 1.26   | -1.42    | 0.43      | -2.29, -0.55  | 0.84     | 0.71      | -0.59, 2.28   | 1.75     | 0.35      | 1.05, 2.45    | 0.030        | 0.008     | 0.013, 0.047   |
| Hispanic                           | -1.38    | 0.55      | -2.49, -0.28  | 0.12     | 0.35      | -0.59, 0.83   | 0.06     | 0.39      | -0.72, 0.84   | 0.27     | 0.36      | -0.44, 0.99   | 0.010        | 0.008     | -0.006, 0.026  |
| Non-Hispanic other race            | 0.81     | 0.65      | -0.50, 2.11   | -0.36    | 0.52      | -1.40, 0.69   | -0.34    | 1.01      | -2.37, 1.68   | 0.05     | 0.59      | -1.13, 1.23   | 0.023        | 0.015     | -0.008, 0.054  |
| <i>N</i> = 2,699                   |          |           |               |          |           |               |          |           |               |          |           |               |              |           |                |
| 2. Strain with spouse              | -0.03    | 0.22      | -0.47, 0.42   | 0.30     | 0.14      | 0.02, 0.57    | 0.11     | 0.22      | -0.33, 0.55   | -0.21    | 0.12      | -0.44, 0.03   | 0.002        | 0.003     | -0.004, 0.009  |
| Age                                | 0.77     | 0.02      | 0.73, 0.81    | 0.81     | 0.01      | 0.78, 0.83    | 0.80     | 0.02      | 0.76, 0.85    | 0.81     | 0.01      | 0.79, 0.83    | 0.001        | 0.000     | 0.001, 0.002   |
| Female sex                         | -0.55    | 0.26      | -1.07, -0.02  | -1.69    | 0.24      | -2.18, -1.20  | -0.89    | 0.40      | -1.70, -0.08  | -2.78    | 0.20      | -3.19, -2.37  | -0.013       | 0.004     | -0.021, -0.005 |
| Race/ethnicity                     |          |           |               |          |           |               |          |           |               |          |           |               |              |           |                |
| Non-Hispanic Black                 | 0.27     | 0.52      | -0.79, 1.33   | -1.55    | 0.46      | -2.47, -0.62  | 0.60     | 0.76      | -0.93, 2.14   | 1.18     | 0.35      | 0.48, 1.88    | 0.022        | 0.008     | 0.006, 0.039   |
| Hispanic                           | -1.24    | 0.53      | -2.32, -0.17  | -0.07    | 0.38      | -0.84, 0.71   | -0.46    | 0.46      | -1.39, 0.48   | -0.46    | 0.34      | -1.14, 0.23   | 0.001        | 0.009     | -0.016, 0.019  |
| Non-Hispanic other race            | 0.93     | 0.65      | -0.39, 2.25   | -0.39    | 0.54      | -1.48, 0.71   | -0.29    | 0.92      | -2.16, 1.57   | 0.29     | 0.55      | -0.83, 1.41   | 0.026        | 0.015     | -0.004, 0.057  |
| Educational attainment             |          |           |               |          |           |               |          |           |               |          |           |               |              |           |                |
| Less than high school              | -0.66    | 0.44      | -1.54, 0.22   | 0.07     | 0.43      | -0.80, 0.93   | 1.09     | 0.66      | -0.24, 2.42   | 1.85     | 0.25      | 1.34, 2.36    | 0.021        | 0.006     | 0.009, 0.033   |
| High school diploma/GED            | -0.23    | 0.37      | -0.96, 0.51   | 0.02     | 0.28      | -0.54, 0.59   | 0.29     | 0.47      | -0.66, 1.23   | 1.17     | 0.24      | 0.69, 1.64    | 0.012        | 0.005     | 0.002, 0.021   |
| Some college                       | -0.37    | 0.41      | -1.21, 0.47   | -0.28    | 0.34      | -0.97, 0.41   | 0.31     | 0.40      | -0.49, 1.11   | 0.96     | 0.26      | 0.44, 1.48    | 0.009        | 0.005     | -0.001, 0.020  |
| BMI category                       |          |           |               |          |           |               |          |           |               |          |           |               |              |           |                |
| Overweight ( $\geq 25$ to $< 30$ ) | -0.33    | 0.38      | -1.09, 0.44   | -0.19    | 0.34      | -0.88, 0.51   | -0.29    | 0.47      | -1.24, 0.66   | 0.15     | 0.23      | -0.33, 0.62   | 0.000        | 0.005     | -0.010, 0.009  |
| Obese I ( $\geq 30$ to $< 35$ )    | 0.46     | 0.42      | -0.39, 1.31   | 0.40     | 0.37      | -0.34, 1.14   | 0.49     | 0.44      | -0.41, 1.39   | 0.81     | 0.28      | 0.24, 1.37    | 0.009        | 0.004     | 0.000, 0.018   |
| Obese II ( $\geq 35$ )             | 1.13     | 0.55      | 0.02, 2.24    | 1.13     | 0.37      | 0.39, 1.88    | 1.48     | 0.58      | 0.32, 2.64    | 1.81     | 0.27      | 1.27, 2.36    | 0.032        | 0.006     | 0.019, 0.045   |
| Smoking status                     |          |           |               |          |           |               |          |           |               |          |           |               |              |           |                |
| Current                            | 0.05     | 0.59      | -1.15, 1.25   | 0.61     | 0.43      | -0.26, 1.48   | 1.21     | 0.63      | -0.06, 2.48   | 7.22     | 0.31      | 6.59, 7.86    | 0.125        | 0.008     | 0.109, 0.142   |
| Former                             | 0.40     | 0.31      | -0.23, 1.02   | 0.16     | 0.27      | -0.38, 0.70   | 0.31     | 0.29      | -0.28, 0.90   | 1.95     | 0.16      | 1.64, 2.27    | 0.028        | 0.004     | 0.020, 0.035   |
| Alcohol use                        |          |           |               |          |           |               |          |           |               |          |           |               |              |           |                |
| 1-4 drinks per day                 | -0.13    | 0.34      | -0.81, 0.55   | -0.37    | 0.26      | -0.89, 0.16   | -0.07    | 0.39      | -0.86, 0.73   | -0.27    | 0.16      | -0.60, 0.06   | -0.004       | 0.004     | -0.011, 0.003  |
| 5+ drinks per day                  | 1.87     | 1.10      | -0.36, 4.10   | 0.80     | 0.76      | -0.74, 2.34   | 2.30     | 0.86      | 0.56, 4.03    | 1.45     | 0.71      | 0.01, 2.89    | 0.004        | 0.013     | -0.022, 0.030  |
| <i>N</i> = 2,699                   |          |           |               |          |           |               |          |           |               |          |           |               |              |           |                |

Note. PoAm = Pace of Aging methylation; *CI* = confidence interval. Bold font denotes statistically significant association following false discovery rate correction.

Table 3

Generalized linear models with support with children predicting epigenetic aging.

| Models                             | Horvath  |           |               | Hannum   |           |               | PhenoAge     |             |                     | GrimAge      |             |                     | Dunedin PoAm  |              |                       |
|------------------------------------|----------|-----------|---------------|----------|-----------|---------------|--------------|-------------|---------------------|--------------|-------------|---------------------|---------------|--------------|-----------------------|
|                                    | <i>B</i> | <i>SE</i> | <i>95% CI</i> | <i>B</i> | <i>SE</i> | <i>95% CI</i> | <i>B</i>     | <i>SE</i>   | <i>95% CI</i>       | <i>B</i>     | <i>SE</i>   | <i>95% CI</i>       | <i>B</i>      | <i>SE</i>    | <i>95% CI</i>         |
| 1. Support with children           | -0.16    | 0.21      | -0.59, 0.27   | -0.15    | 0.16      | -0.46, 0.17   | <b>-0.47</b> | <b>0.20</b> | <b>-0.87, -0.06</b> | <b>-0.39</b> | <b>0.12</b> | <b>-0.63, -0.15</b> | <b>-0.008</b> | <b>0.003</b> | <b>-0.013, -0.003</b> |
| Age                                | 0.75     | 0.02      | 0.72, 0.78    | 0.79     | 0.01      | 0.77, 0.81    | 0.78         | 0.02        | 0.75, 0.82          | 0.78         | 0.01        | 0.76, 0.80          | 0.001         | 0.000        | 0.001, 0.001          |
| Female sex                         | -0.92    | 0.26      | -1.44, -0.39  | -1.83    | 0.21      | -2.25, -1.42  | -1.23        | 0.35        | -1.93, -0.53        | -3.18        | 0.21        | -3.60, -2.75        | -0.018        | 0.004        | -0.026, -0.009        |
| Race/ethnicity                     |          |           |               |          |           |               |              |             |                     |              |             |                     |               |              |                       |
| Non-Hispanic Black                 | 0.04     | 0.40      | -0.77, 0.84   | -1.67    | 0.35      | -2.38, -0.96  | 0.71         | 0.52        | -0.33, 1.76         | 1.84         | 0.27        | 1.29, 2.40          | 0.034         | 0.007        | 0.020, 0.048          |
| Hispanic                           | -1.38    | 0.44      | -2.26, -0.50  | 0.19     | 0.27      | -0.36, 0.74   | 0.06         | 0.33        | -0.61, 0.73         | 0.14         | 0.30        | -0.47, 0.75         | 0.010         | 0.007        | -0.005, 0.024         |
| Non-Hispanic other race            | 0.93     | 0.58      | -0.24, 2.10   | -0.19    | 0.47      | -1.14, 0.75   | 0.58         | 1.00        | -1.42, 2.58         | 0.25         | 0.53        | -0.81, 1.32         | 0.024         | 0.014        | -0.004, 0.053         |
| <i>N</i> = 3,306                   |          |           |               |          |           |               |              |             |                     |              |             |                     |               |              |                       |
| 2. Support with children           | -0.13    | 0.22      | -0.56, 0.31   | -0.10    | 0.16      | -0.42, 0.22   | -0.39        | 0.20        | -0.80, 0.02         | -0.25        | 0.11        | -0.46, -0.03        | -0.006        | 0.002        | -0.010, -0.001        |
| Age                                | 0.76     | 0.02      | 0.72, 0.79    | 0.79     | 0.01      | 0.77, 0.82    | 0.79         | 0.02        | 0.76, 0.83          | 0.80         | 0.01        | 0.78, 0.82          | 0.001         | 0.000        | 0.001, 0.002          |
| Female sex                         | -0.89    | 0.26      | -1.42, -0.36  | -1.89    | 0.21      | -2.32, -1.47  | -1.20        | 0.37        | -1.94, -0.45        | -2.97        | 0.18        | -3.33, -2.60        | -0.016        | 0.004        | -0.024, -0.009        |
| Race/ethnicity                     |          |           |               |          |           |               |              |             |                     |              |             |                     |               |              |                       |
| Non-Hispanic Black                 | -0.01    | 0.41      | -0.84, 0.81   | -1.85    | 0.38      | -2.61, -1.09  | 0.45         | 0.56        | -0.69, 1.59         | 1.35         | 0.27        | 0.80, 1.90          | 0.026         | 0.007        | 0.012, 0.040          |
| Hispanic                           | -1.38    | 0.44      | -2.26, -0.49  | -0.02    | 0.31      | -0.65, 0.61   | -0.45        | 0.45        | -1.36, 0.45         | -0.49        | 0.29        | -1.09, 0.10         | 0.001         | 0.007        | -0.014, 0.016         |
| Non-Hispanic other race            | 0.97     | 0.58      | -0.20, 2.15   | -0.28    | 0.50      | -1.28, 0.72   | 0.61         | 0.93        | -1.26, 2.48         | 0.57         | 0.51        | -0.46, 1.60         | 0.029         | 0.014        | 0.000, 0.057          |
| Educational attainment             |          |           |               |          |           |               |              |             |                     |              |             |                     |               |              |                       |
| Less than high school              | -0.18    | 0.45      | -1.09, 0.72   | 0.13     | 0.43      | -0.74, 1.00   | 1.08         | 0.62        | -0.18, 2.34         | 1.76         | 0.22        | 1.31, 2.21          | 0.022         | 0.005        | 0.012, 0.032          |
| High school diploma/GED            | -0.14    | 0.35      | -0.84, 0.56   | -0.01    | 0.26      | -0.54, 0.52   | 0.27         | 0.41        | -0.55, 1.09         | 1.16         | 0.17        | 0.82, 1.51          | 0.014         | 0.005        | 0.005, 0.024          |
| Some college                       | -0.32    | 0.34      | -1.00, 0.37   | -0.41    | 0.30      | -1.02, 0.21   | 0.27         | 0.40        | -0.53, 1.08         | 1.01         | 0.21        | 0.59, 1.42          | 0.011         | 0.004        | 0.003, 0.019          |
| BMI category                       |          |           |               |          |           |               |              |             |                     |              |             |                     |               |              |                       |
| Overweight ( $\geq 25$ to $< 30$ ) | -0.31    | 0.35      | -1.02, 0.40   | -0.16    | 0.33      | -0.84, 0.51   | -0.21        | 0.41        | -1.03, 0.62         | 0.08         | 0.23        | -0.38, 0.55         | -0.001        | 0.004        | -0.010, 0.008         |
| Obese I ( $\geq 30$ to $< 35$ )    | 0.35     | 0.39      | -0.42, 1.13   | 0.29     | 0.36      | -0.45, 1.02   | 0.41         | 0.43        | -0.45, 1.27         | 0.52         | 0.27        | -0.02, 1.06         | 0.009         | 0.004        | 0.001, 0.017          |
| Obese II ( $\geq 35$ )             | 0.99     | 0.51      | -0.03, 2.01   | 1.09     | 0.38      | 0.32, 1.86    | 1.64         | 0.62        | 0.39, 2.88          | 1.54         | 0.27        | 1.00, 2.07          | 0.032         | 0.005        | 0.022, 0.043          |
| Smoking status                     |          |           |               |          |           |               |              |             |                     |              |             |                     |               |              |                       |
| Current                            | 0.17     | 0.52      | -0.88, 1.22   | 0.58     | 0.38      | -0.19, 1.35   | 1.11         | 0.55        | -0.01, 2.23         | 7.46         | 0.32        | 6.82, 8.10          | 0.126         | 0.007        | 0.111, 0.140          |
| Former                             | 0.24     | 0.26      | -0.29, 0.77   | 0.01     | 0.23      | -0.46, 0.47   | 0.37         | 0.28        | -0.19, 0.93         | 1.99         | 0.13        | 1.72, 2.26          | 0.024         | 0.003        | 0.017, 0.031          |
| Alcohol use                        |          |           |               |          |           |               |              |             |                     |              |             |                     |               |              |                       |
| 1-4 drinks per day                 | -0.10    | 0.25      | -0.61, 0.40   | -0.50    | 0.22      | -0.94, -0.07  | -0.21        | 0.35        | -0.93, 0.50         | -0.38        | 0.13        | -0.64, -0.11        | -0.006        | 0.003        | -0.013, 0.000         |
| 5+ drinks per day                  | 1.13     | 0.99      | -0.86, 3.12   | 0.66     | 0.71      | -0.78, 2.10   | 2.56         | 0.84        | 0.87, 4.25          | 0.83         | 0.54        | -0.26, 1.92         | -0.007        | 0.011        | -0.028, 0.015         |
| <i>N</i> = 3,306                   |          |           |               |          |           |               |              |             |                     |              |             |                     |               |              |                       |

Note. PoAm = Pace of Aging methylation; *CI* = confidence interval. Bold font denotes statistically significant association following false discovery rate correction.

Table 4

Generalized linear models with strain with children predicting epigenetic aging.

| Models                             | Horvath  |           |               | Hannum   |           |               | PhenoAge |           |               | GrimAge  |           |               | Dunedin PoAm |           |                |
|------------------------------------|----------|-----------|---------------|----------|-----------|---------------|----------|-----------|---------------|----------|-----------|---------------|--------------|-----------|----------------|
|                                    | <i>B</i> | <i>SE</i> | <i>95% CI</i> | <i>B</i> | <i>SE</i> | <i>95% CI</i> | <i>B</i> | <i>SE</i> | <i>95% CI</i> | <i>B</i> | <i>SE</i> | <i>95% CI</i> | <i>B</i>     | <i>SE</i> | <i>95% CI</i>  |
| 1. Strain with children            | 0.21     | 0.19      | -0.16, 0.59   | 0.16     | 0.15      | -0.14, 0.47   | 0.49     | 0.28      | -0.07, 1.06   | 0.32     | 0.14      | 0.05, 0.59    | 0.006        | 0.003     | 0.001, 0.011   |
| Age                                | 0.75     | 0.02      | 0.72, 0.78    | 0.79     | 0.01      | 0.77, 0.82    | 0.78     | 0.02      | 0.75, 0.82    | 0.78     | 0.01      | 0.76, 0.79    | 0.001        | 0.000     | 0.001, 0.001   |
| Female sex                         | -0.97    | 0.26      | -1.50, -0.44  | -1.88    | 0.21      | -2.30, -1.45  | -1.35    | 0.36      | -2.07, -0.62  | -3.28    | 0.21      | -3.70, -2.87  | -0.020       | 0.004     | -0.028, -0.011 |
| Race/ethnicity                     |          |           |               |          |           |               |          |           |               |          |           |               |              |           |                |
| Non-Hispanic Black                 | 0.02     | 0.40      | -0.79, 0.83   | -1.71    | 0.34      | -2.39, -1.03  | 0.62     | 0.50      | -0.39, 1.63   | 1.81     | 0.27      | 1.26, 2.36    | 0.033        | 0.007     | 0.019, 0.047   |
| Hispanic                           | -1.36    | 0.44      | -2.25, -0.48  | 0.13     | 0.27      | -0.41, 0.68   | 0.04     | 0.33      | -0.63, 0.70   | 0.10     | 0.30      | -0.51, 0.71   | 0.009        | 0.007     | -0.005, 0.023  |
| Non-Hispanic other race            | 0.90     | 0.59      | -0.28, 2.09   | -0.21    | 0.48      | -1.17, 0.74   | 0.51     | 0.99      | -1.48, 2.50   | 0.20     | 0.55      | -0.89, 1.30   | 0.024        | 0.015     | -0.006, 0.053  |
| <i>N</i> = 3,314                   |          |           |               |          |           |               |          |           |               |          |           |               |              |           |                |
| 2. Strain with children            | 0.16     | 0.19      | -0.22, 0.55   | 0.09     | 0.14      | -0.21, 0.38   | 0.38     | 0.29      | -0.21, 0.96   | 0.06     | 0.11      | -0.16, 0.29   | 0.002        | 0.002     | -0.003, 0.007  |
| Age                                | 0.76     | 0.02      | 0.72, 0.79    | 0.79     | 0.01      | 0.77, 0.82    | 0.79     | 0.02      | 0.76, 0.83    | 0.80     | 0.01      | 0.78, 0.82    | 0.001        | 0.000     | 0.001, 0.002   |
| Female sex                         | -0.94    | 0.26      | -1.47, -0.40  | -1.92    | 0.22      | -2.36, -1.49  | -1.29    | 0.38      | -2.06, -0.53  | -3.03    | 0.18      | -3.39, -2.67  | -0.018       | 0.004     | -0.025, -0.010 |
| Race/ethnicity                     |          |           |               |          |           |               |          |           |               |          |           |               |              |           |                |
| Non-Hispanic Black                 | -0.02    | 0.41      | -0.84, 0.81   | -1.89    | 0.36      | -2.62, -1.15  | 0.37     | 0.55      | -0.74, 1.48   | 1.34     | 0.27      | 0.79, 1.89    | 0.025        | 0.007     | 0.011, 0.039   |
| Hispanic                           | -1.37    | 0.44      | -2.25, -0.48  | -0.09    | 0.31      | -0.73, 0.54   | -0.47    | 0.45      | -1.37, 0.43   | -0.52    | 0.28      | -1.09, 0.06   | 0.001        | 0.007     | -0.014, 0.015  |
| Non-Hispanic other race            | 0.95     | 0.59      | -0.24, 2.14   | -0.29    | 0.50      | -1.31, 0.72   | 0.55     | 0.92      | -1.31, 2.42   | 0.55     | 0.52      | -0.50, 1.60   | 0.028        | 0.014     | -0.001, 0.057  |
| Educational attainment             |          |           |               |          |           |               |          |           |               |          |           |               |              |           |                |
| Less than high school              | -0.18    | 0.44      | -1.08, 0.71   | 0.16     | 0.44      | -0.72, 1.05   | 1.09     | 0.62      | -0.18, 2.35   | 1.78     | 0.22      | 1.33, 2.23    | 0.022        | 0.005     | 0.012, 0.033   |
| High school diploma/GED            | -0.15    | 0.35      | -0.86, 0.55   | 0.00     | 0.27      | -0.54, 0.54   | 0.26     | 0.41      | -0.56, 1.08   | 1.17     | 0.17      | 0.83, 1.52    | 0.014        | 0.005     | 0.005, 0.024   |
| Some college                       | -0.33    | 0.34      | -1.01, 0.35   | -0.39    | 0.31      | -1.02, 0.23   | 0.25     | 0.40      | -0.55, 1.06   | 1.01     | 0.21      | 0.59, 1.43    | 0.011        | 0.004     | 0.003, 0.019   |
| BMI category                       |          |           |               |          |           |               |          |           |               |          |           |               |              |           |                |
| Overweight ( $\geq 25$ to $< 30$ ) | -0.31    | 0.35      | -1.01, 0.39   | -0.14    | 0.33      | -0.80, 0.52   | -0.21    | 0.40      | -1.03, 0.61   | 0.08     | 0.23      | -0.39, 0.54   | -0.001       | 0.004     | -0.010, 0.008  |
| Obese I ( $\geq 30$ to $< 35$ )    | 0.35     | 0.39      | -0.43, 1.14   | 0.32     | 0.36      | -0.40, 1.04   | 0.44     | 0.43      | -0.42, 1.29   | 0.53     | 0.27      | -0.02, 1.08   | 0.009        | 0.004     | 0.001, 0.017   |
| Obese II ( $\geq 35$ )             | 0.97     | 0.51      | -0.05, 2.00   | 1.11     | 0.37      | 0.36, 1.87    | 1.62     | 0.62      | 0.37, 2.86    | 1.54     | 0.26      | 1.00, 2.07    | 0.032        | 0.005     | 0.022, 0.042   |
| Smoking status                     |          |           |               |          |           |               |          |           |               |          |           |               |              |           |                |
| Current                            | 0.16     | 0.52      | -0.89, 1.21   | 0.59     | 0.38      | -0.18, 1.35   | 1.11     | 0.55      | -0.01, 2.22   | 7.47     | 0.31      | 6.83, 8.10    | 0.126        | 0.007     | 0.111, 0.140   |
| Former                             | 0.23     | 0.27      | -0.31, 0.77   | 0.01     | 0.23      | -0.45, 0.47   | 0.36     | 0.28      | -0.20, 0.92   | 2.00     | 0.14      | 1.73, 2.28    | 0.024        | 0.004     | 0.017, 0.031   |
| Alcohol use                        |          |           |               |          |           |               |          |           |               |          |           |               |              |           |                |
| 1-4 drinks per day                 | -0.10    | 0.25      | -0.61, 0.40   | -0.49    | 0.21      | -0.92, -0.06  | -0.20    | 0.36      | -0.91, 0.52   | -0.37    | 0.13      | -0.64, -0.11  | -0.006       | 0.003     | -0.013, 0.000  |
| 5+ drinks per day                  | 1.15     | 0.98      | -0.83, 3.13   | 0.68     | 0.71      | -0.75, 2.11   | 2.60     | 0.83      | 0.91, 4.28    | 0.84     | 0.55      | -0.27, 1.94   | -0.007       | 0.010     | -0.028, 0.014  |
| <i>N</i> = 3,314                   |          |           |               |          |           |               |          |           |               |          |           |               |              |           |                |

Note. PoAm = Pace of Aging methylation; *CI* = confidence interval. Bold font denotes statistically significant association following false discovery rate correction.

Table 5

Generalized linear models with support with other family members predicting epigenetic aging.

| Models                             | Horvath  |           |               | Hannum   |           |               | PhenoAge |           |               | GrimAge  |           |               | Dunedin PoAm  |              |                       |
|------------------------------------|----------|-----------|---------------|----------|-----------|---------------|----------|-----------|---------------|----------|-----------|---------------|---------------|--------------|-----------------------|
|                                    | <i>B</i> | <i>SE</i> | <i>95% CI</i> | <i>B</i> | <i>SE</i> | <i>95% CI</i> | <i>B</i> | <i>SE</i> | <i>95% CI</i> | <i>B</i> | <i>SE</i> | <i>95% CI</i> | <i>B</i>      | <i>SE</i>    | <i>95% CI</i>         |
| 1. Support with other family       | 0.03     | 0.14      | -0.25, 0.31   | -0.16    | 0.12      | -0.40, 0.07   | 0.00     | 0.14      | -0.27, 0.27   | -0.24    | 0.11      | -0.46, -0.01  | <b>-0.006</b> | <b>0.002</b> | <b>-0.010, -0.002</b> |
| Age                                | 0.74     | 0.02      | 0.70, 0.77    | 0.78     | 0.01      | 0.76, 0.81    | 0.78     | 0.02      | 0.74, 0.81    | 0.77     | 0.01      | 0.76, 0.79    | 0.001         | 0.000        | 0.000, 0.001          |
| Female sex                         | -0.89    | 0.27      | -1.42, -0.36  | -1.76    | 0.20      | -2.16, -1.36  | -1.22    | 0.31      | -1.84, -0.59  | -3.25    | 0.21      | -3.68, -2.82  | -0.017        | 0.004        | -0.025, -0.009        |
| Race/ethnicity                     |          |           |               |          |           |               |          |           |               |          |           |               |               |              |                       |
| Non-Hispanic Black                 | -0.10    | 0.38      | -0.86, 0.66   | -1.71    | 0.32      | -2.36, -1.06  | 0.83     | 0.48      | -0.13, 1.80   | 1.85     | 0.25      | 1.35, 2.35    | 0.034         | 0.007        | 0.021, 0.048          |
| Hispanic                           | -1.45    | 0.45      | -2.35, -0.56  | 0.07     | 0.27      | -0.47, 0.61   | 0.10     | 0.36      | -0.62, 0.83   | 0.12     | 0.30      | -0.48, 0.73   | 0.007         | 0.007        | -0.006, 0.021         |
| Non-Hispanic other race            | 0.56     | 0.55      | -0.54, 1.66   | -0.28    | 0.50      | -1.28, 0.72   | 0.35     | 0.91      | -1.48, 2.17   | 0.33     | 0.49      | -0.66, 1.32   | 0.030         | 0.013        | 0.003, 0.056          |
| <i>N</i> = 3,570                   |          |           |               |          |           |               |          |           |               |          |           |               |               |              |                       |
| 2. Support with other family       | 0.07     | 0.14      | -0.21, 0.34   | -0.13    | 0.11      | -0.36, 0.11   | 0.06     | 0.14      | -0.22, 0.34   | -0.19    | 0.08      | -0.35, -0.02  | <b>-0.005</b> | <b>0.002</b> | <b>-0.008, -0.002</b> |
| Age                                | 0.74     | 0.02      | 0.71, 0.78    | 0.79     | 0.01      | 0.77, 0.81    | 0.78     | 0.02      | 0.75, 0.82    | 0.80     | 0.01      | 0.78, 0.81    | 0.001         | 0.000        | 0.001, 0.002          |
| Female sex                         | -0.91    | 0.26      | -1.43, -0.40  | -1.84    | 0.20      | -2.24, -1.43  | -1.22    | 0.33      | -1.88, -0.56  | -2.96    | 0.19      | -3.35, -2.57  | -0.014        | 0.003        | -0.020, -0.007        |
| Race/ethnicity                     |          |           |               |          |           |               |          |           |               |          |           |               |               |              |                       |
| Non-Hispanic Black                 | -0.14    | 0.38      | -0.91, 0.63   | -1.91    | 0.35      | -2.61, -1.21  | 0.53     | 0.52      | -0.52, 1.57   | 1.28     | 0.23      | 0.82, 1.74    | 0.025         | 0.006        | 0.013, 0.038          |
| Hispanic                           | -1.41    | 0.43      | -2.28, -0.53  | -0.15    | 0.33      | -0.81, 0.51   | -0.43    | 0.45      | -1.34, 0.47   | -0.46    | 0.28      | -1.02, 0.10   | 0.001         | 0.007        | -0.014, 0.015         |
| Non-Hispanic other race            | 0.66     | 0.55      | -0.44, 1.77   | -0.33    | 0.52      | -1.38, 0.73   | 0.41     | 0.85      | -1.31, 2.12   | 0.58     | 0.45      | -0.34, 1.49   | 0.033         | 0.013        | 0.007, 0.059          |
| Educational attainment             |          |           |               |          |           |               |          |           |               |          |           |               |               |              |                       |
| Less than high school              | -0.21    | 0.42      | -1.05, 0.63   | 0.27     | 0.40      | -0.54, 1.09   | 1.29     | 0.55      | 0.17, 2.40    | 1.77     | 0.25      | 1.26, 2.27    | 0.018         | 0.005        | 0.008, 0.028          |
| High school diploma/GED            | 0.10     | 0.34      | -0.58, 0.79   | 0.22     | 0.27      | -0.33, 0.78   | 0.68     | 0.42      | -0.17, 1.53   | 1.31     | 0.18      | 0.94, 1.68    | 0.014         | 0.005        | 0.005, 0.023          |
| Some college                       | -0.07    | 0.30      | -0.67, 0.54   | -0.09    | 0.27      | -0.64, 0.46   | 0.68     | 0.38      | -0.10, 1.46   | 1.13     | 0.22      | 0.68, 1.58    | 0.011         | 0.004        | 0.002, 0.020          |
| BMI category                       |          |           |               |          |           |               |          |           |               |          |           |               |               |              |                       |
| Overweight ( $\geq 25$ to $< 30$ ) | -0.58    | 0.35      | -1.28, 0.12   | -0.11    | 0.31      | -0.74, 0.51   | -0.29    | 0.42      | -1.13, 0.56   | 0.07     | 0.20      | -0.34, 0.48   | 0.001         | 0.004        | -0.007, 0.010         |
| Obese I ( $\geq 30$ to $< 35$ )    | 0.07     | 0.41      | -0.76, 0.89   | 0.22     | 0.35      | -0.49, 0.93   | 0.31     | 0.44      | -0.57, 1.20   | 0.48     | 0.23      | 0.03, 0.94    | 0.010         | 0.004        | 0.003, 0.018          |
| Obese II ( $\geq 35$ )             | 0.58     | 0.50      | -0.43, 1.59   | 1.02     | 0.35      | 0.31, 1.73    | 1.67     | 0.52      | 0.61, 2.73    | 1.53     | 0.24      | 1.05, 2.01    | 0.033         | 0.005        | 0.023, 0.043          |
| Smoking status                     |          |           |               |          |           |               |          |           |               |          |           |               |               |              |                       |
| Current                            | 0.25     | 0.51      | -0.78, 1.29   | 0.69     | 0.34      | 0.01, 1.37    | 0.99     | 0.46      | 0.07, 1.92    | 7.48     | 0.31      | 6.85, 8.10    | 0.123         | 0.007        | 0.110, 0.137          |
| Former                             | 0.27     | 0.28      | -0.30, 0.84   | -0.03    | 0.24      | -0.51, 0.45   | 0.23     | 0.28      | -0.33, 0.79   | 1.91     | 0.14      | 1.62, 2.19    | 0.025         | 0.003        | 0.018, 0.031          |
| Alcohol use                        |          |           |               |          |           |               |          |           |               |          |           |               |               |              |                       |
| 1-4 drinks per day                 | -0.15    | 0.27      | -0.69, 0.38   | -0.40    | 0.21      | -0.83, 0.02   | -0.13    | 0.33      | -0.81, 0.54   | -0.35    | 0.13      | -0.62, -0.07  | -0.006        | 0.003        | -0.013, 0.001         |
| 5+ drinks per day                  | 1.10     | 0.81      | -0.54, 2.74   | 0.37     | 0.64      | -0.92, 1.66   | 2.35     | 0.78      | 0.78, 3.92    | 1.37     | 0.53      | 0.30, 2.44    | 0.004         | 0.011        | -0.018, 0.026         |
| <i>N</i> = 3,570                   |          |           |               |          |           |               |          |           |               |          |           |               |               |              |                       |

Note. PoAm = Pace of Aging methylation; *CI* = confidence interval. Bold font denotes statistically significant association following false discovery rate correction.

Table 6

Generalized linear models with strain with other family members predicting epigenetic aging.

| Models                             | Horvath  |           |               | Hannum   |           |               | PhenoAge |           |               | GrimAge  |           |               | Dunedin PoAm |           |                |
|------------------------------------|----------|-----------|---------------|----------|-----------|---------------|----------|-----------|---------------|----------|-----------|---------------|--------------|-----------|----------------|
|                                    | <i>B</i> | <i>SE</i> | <i>95% CI</i> | <i>B</i> | <i>SE</i> | <i>95% CI</i> | <i>B</i> | <i>SE</i> | <i>95% CI</i> | <i>B</i> | <i>SE</i> | <i>95% CI</i> | <i>B</i>     | <i>SE</i> | <i>95% CI</i>  |
| 1. Strain with other family        | 0.14     | 0.24      | -0.35, 0.62   | 0.21     | 0.17      | -0.13, 0.54   | -0.01    | 0.24      | -0.50, 0.48   | 0.22     | 0.15      | -0.08, 0.52   | 0.005        | 0.003     | -0.002, 0.011  |
| Age                                | 0.74     | 0.02      | 0.71, 0.78    | 0.79     | 0.01      | 0.76, 0.81    | 0.78     | 0.02      | 0.74, 0.81    | 0.77     | 0.01      | 0.76, 0.79    | 0.001        | 0.000     | 0.000, 0.001   |
| Female sex                         | -0.91    | 0.26      | -1.44, -0.38  | -1.82    | 0.21      | -2.23, -1.40  | -1.21    | 0.32      | -1.86, -0.57  | -3.31    | 0.21      | -3.74, -2.88  | -0.019       | 0.004     | -0.027, -0.011 |
| Race/ethnicity                     |          |           |               |          |           |               |          |           |               |          |           |               |              |           |                |
| Non-Hispanic Black                 | -0.12    | 0.39      | -0.90, 0.65   | -1.78    | 0.33      | -2.44, -1.13  | 0.84     | 0.48      | -0.13, 1.80   | 1.77     | 0.25      | 1.27, 2.27    | 0.032        | 0.007     | 0.019, 0.046   |
| Hispanic                           | -1.46    | 0.45      | -2.37, -0.55  | 0.01     | 0.26      | -0.51, 0.53   | 0.10     | 0.36      | -0.62, 0.82   | 0.05     | 0.30      | -0.55, 0.64   | 0.005        | 0.007     | -0.009, 0.019  |
| Non-Hispanic other race            | 0.56     | 0.55      | -0.55, 1.66   | -0.31    | 0.50      | -1.31, 0.69   | 0.35     | 0.91      | -1.48, 2.18   | 0.30     | 0.50      | -0.71, 1.30   | 0.028        | 0.013     | 0.001, 0.055   |
| <i>N</i> = 3,569                   |          |           |               |          |           |               |          |           |               |          |           |               |              |           |                |
| 2. Strain with other family        | 0.10     | 0.24      | -0.38, 0.58   | 0.15     | 0.17      | -0.19, 0.49   | -0.11    | 0.26      | -0.63, 0.41   | 0.02     | 0.12      | -0.23, 0.27   | 0.001        | 0.003     | -0.005, 0.007  |
| Age                                | 0.74     | 0.02      | 0.71, 0.78    | 0.79     | 0.01      | 0.77, 0.81    | 0.78     | 0.02      | 0.75, 0.82    | 0.80     | 0.01      | 0.78, 0.81    | 0.001        | 0.000     | 0.001, 0.002   |
| Female sex                         | -0.91    | 0.25      | -1.42, -0.40  | -1.88    | 0.21      | -2.30, -1.46  | -1.20    | 0.33      | -1.87, -0.53  | -3.00    | 0.19      | -3.38, -2.61  | -0.015       | 0.003     | -0.022, -0.008 |
| Race/ethnicity                     |          |           |               |          |           |               |          |           |               |          |           |               |              |           |                |
| Non-Hispanic Black                 | -0.15    | 0.39      | -0.95, 0.64   | -1.96    | 0.35      | -2.67, -1.25  | 0.56     | 0.52      | -0.48, 1.61   | 1.24     | 0.23      | 0.77, 1.71    | 0.024        | 0.006     | 0.011, 0.037   |
| Hispanic                           | -1.43    | 0.44      | -2.32, -0.53  | -0.19    | 0.32      | -0.83, 0.45   | -0.41    | 0.44      | -1.31, 0.49   | -0.49    | 0.27      | -1.04, 0.05   | -0.001       | 0.007     | -0.015, 0.013  |
| Non-Hispanic other race            | 0.66     | 0.55      | -0.44, 1.77   | -0.35    | 0.52      | -1.41, 0.71   | 0.42     | 0.85      | -1.30, 2.14   | 0.55     | 0.46      | -0.39, 1.49   | 0.032        | 0.013     | 0.005, 0.059   |
| Educational attainment             |          |           |               |          |           |               |          |           |               |          |           |               |              |           |                |
| Less than high school              | -0.16    | 0.43      | -1.03, 0.71   | 0.26     | 0.40      | -0.56, 1.08   | 1.28     | 0.56      | 0.16, 2.40    | 1.72     | 0.25      | 1.22, 2.22    | 0.018        | 0.005     | 0.008, 0.028   |
| High school diploma/GED            | 0.10     | 0.34      | -0.59, 0.79   | 0.23     | 0.27      | -0.32, 0.78   | 0.67     | 0.42      | -0.18, 1.52   | 1.32     | 0.18      | 0.94, 1.69    | 0.014        | 0.005     | 0.005, 0.023   |
| Some college                       | -0.07    | 0.30      | -0.68, 0.54   | -0.10    | 0.27      | -0.65, 0.45   | 0.68     | 0.39      | -0.10, 1.46   | 1.13     | 0.22      | 0.67, 1.58    | 0.011        | 0.004     | 0.002, 0.020   |
| BMI category                       |          |           |               |          |           |               |          |           |               |          |           |               |              |           |                |
| Overweight ( $\geq 25$ to $< 30$ ) | -0.57    | 0.35      | -1.27, 0.14   | -0.11    | 0.31      | -0.74, 0.52   | -0.29    | 0.42      | -1.14, 0.55   | 0.06     | 0.20      | -0.35, 0.48   | 0.002        | 0.004     | -0.007, 0.010  |
| Obese I ( $\geq 30$ to $< 35$ )    | 0.06     | 0.41      | -0.77, 0.89   | 0.23     | 0.35      | -0.48, 0.94   | 0.31     | 0.44      | -0.58, 1.19   | 0.50     | 0.23      | 0.04, 0.97    | 0.011        | 0.004     | 0.003, 0.019   |
| Obese II ( $\geq 35$ )             | 0.55     | 0.49      | -0.44, 1.55   | 1.03     | 0.35      | 0.32, 1.73    | 1.67     | 0.53      | 0.61, 2.73    | 1.57     | 0.25      | 1.07, 2.07    | 0.034        | 0.005     | 0.023, 0.044   |
| Smoking status                     |          |           |               |          |           |               |          |           |               |          |           |               |              |           |                |
| Current                            | 0.29     | 0.51      | -0.74, 1.31   | 0.67     | 0.33      | 0.00, 1.35    | 1.00     | 0.46      | 0.07, 1.92    | 7.45     | 0.30      | 6.83, 8.06    | 0.123        | 0.007     | 0.110, 0.137   |
| Former                             | 0.26     | 0.28      | -0.31, 0.83   | -0.03    | 0.24      | -0.51, 0.45   | 0.23     | 0.28      | -0.33, 0.78   | 1.92     | 0.14      | 1.63, 2.20    | 0.025        | 0.003     | 0.018, 0.032   |
| Alcohol use                        |          |           |               |          |           |               |          |           |               |          |           |               |              |           |                |
| 1-4 drinks per day                 | -0.15    | 0.27      | -0.70, 0.39   | -0.40    | 0.21      | -0.83, 0.03   | -0.14    | 0.34      | -0.82, 0.54   | -0.34    | 0.13      | -0.61, -0.07  | -0.006       | 0.003     | -0.013, 0.001  |
| 5+ drinks per day                  | 1.09     | 0.82      | -0.55, 2.74   | 0.39     | 0.64      | -0.90, 1.68   | 2.34     | 0.78      | 0.77, 3.91    | 1.39     | 0.54      | 0.31, 2.47    | 0.004        | 0.011     | -0.017, 0.026  |
| <i>N</i> = 3,569                   |          |           |               |          |           |               |          |           |               |          |           |               |              |           |                |

Note. PoAm = Pace of Aging methylation; *CI* = confidence interval. Bold font denotes statistically significant association following false discovery rate correction.

Table 7

Generalized linear models with support with friends predicting epigenetic aging.

| Models                             | Horvath  |           |               | Hannum   |           |               | PhenoAge |           |               | GrimAge      |             |                     | Dunedin PoAm  |              |                       |
|------------------------------------|----------|-----------|---------------|----------|-----------|---------------|----------|-----------|---------------|--------------|-------------|---------------------|---------------|--------------|-----------------------|
|                                    | <i>B</i> | <i>SE</i> | <i>95% CI</i> | <i>B</i> | <i>SE</i> | <i>95% CI</i> | <i>B</i> | <i>SE</i> | <i>95% CI</i> | <i>B</i>     | <i>SE</i>   | <i>95% CI</i>       | <i>B</i>      | <i>SE</i>    | <i>95% CI</i>         |
| 1. Support with friends            | -0.18    | 0.17      | -0.52, 0.16   | 0.03     | 0.14      | -0.25, 0.31   | -0.08    | 0.20      | -0.49, 0.33   | <b>-0.38</b> | <b>0.10</b> | <b>-0.59, -0.17</b> | <b>-0.005</b> | <b>0.002</b> | <b>-0.010, -0.001</b> |
| Age                                | 0.74     | 0.02      | 0.71, 0.78    | 0.79     | 0.01      | 0.76, 0.81    | 0.78     | 0.02      | 0.75, 0.81    | 0.78         | 0.01        | 0.76, 0.79          | 0.001         | 0.000        | 0.000, 0.001          |
| Female sex                         | -0.88    | 0.28      | -1.45, -0.31  | -1.82    | 0.23      | -2.27, -1.37  | -1.21    | 0.31      | -1.82, -0.59  | -3.20        | 0.22        | -3.64, -2.76        | -0.018        | 0.004        | -0.026, -0.010        |
| Race/ethnicity                     |          |           |               |          |           |               |          |           |               |              |             |                     |               |              |                       |
| Non-Hispanic Black                 | 0.12     | 0.40      | -0.69, 0.94   | -1.67    | 0.33      | -2.33, -1.01  | 0.89     | 0.50      | -0.11, 1.89   | 1.98         | 0.24        | 1.51, 2.46          | 0.037         | 0.007        | 0.023, 0.050          |
| Hispanic                           | -1.45    | 0.43      | -2.31, -0.59  | 0.00     | 0.26      | -0.53, 0.52   | 0.02     | 0.36      | -0.71, 0.74   | 0.02         | 0.29        | -0.57, 0.61         | 0.006         | 0.007        | -0.008, 0.020         |
| Non-Hispanic other race            | 0.44     | 0.59      | -0.75, 1.62   | -0.53    | 0.61      | -1.76, 0.69   | 0.19     | 0.95      | -1.72, 2.11   | 0.46         | 0.41        | -0.36, 1.28         | 0.032         | 0.011        | 0.010, 0.054          |
| <i>N</i> = 3,475                   |          |           |               |          |           |               |          |           |               |              |             |                     |               |              |                       |
| 2. Support with friends            | -0.16    | 0.17      | -0.51, 0.19   | 0.09     | 0.15      | -0.20, 0.38   | 0.02     | 0.22      | -0.41, 0.46   | <b>-0.26</b> | <b>0.09</b> | <b>-0.45, -0.08</b> | -0.004        | 0.002        | -0.008, 0.001         |
| Age                                | 0.75     | 0.02      | 0.71, 0.79    | 0.79     | 0.01      | 0.77, 0.81    | 0.79     | 0.02      | 0.76, 0.82    | 0.80         | 0.01        | 0.79, 0.82          | 0.001         | 0.000        | 0.001, 0.002          |
| Female sex                         | -0.88    | 0.27      | -1.43, -0.33  | -1.89    | 0.23      | -2.36, -1.42  | -1.20    | 0.32      | -1.84, -0.56  | -2.95        | 0.19        | -3.33, -2.57        | -0.015        | 0.003        | -0.022, -0.008        |
| Race/ethnicity                     |          |           |               |          |           |               |          |           |               |              |             |                     |               |              |                       |
| Non-Hispanic Black                 | 0.10     | 0.41      | -0.72, 0.92   | -1.85    | 0.35      | -2.56, -1.15  | 0.61     | 0.53      | -0.46, 1.69   | 1.44         | 0.22        | 1.00, 1.89          | 0.028         | 0.006        | 0.015, 0.040          |
| Hispanic                           | -1.38    | 0.43      | -2.26, -0.50  | -0.14    | 0.31      | -0.77, 0.49   | -0.42    | 0.44      | -1.31, 0.47   | -0.47        | 0.28        | -1.03, 0.09         | 0.000         | 0.007        | -0.014, 0.015         |
| Non-Hispanic other race            | 0.57     | 0.58      | -0.61, 1.75   | -0.51    | 0.62      | -1.76, 0.74   | 0.37     | 0.93      | -1.52, 2.26   | 0.84         | 0.34        | 0.15, 1.54          | 0.037         | 0.011        | 0.014, 0.060          |
| Educational attainment             |          |           |               |          |           |               |          |           |               |              |             |                     |               |              |                       |
| Less than high school              | -0.22    | 0.42      | -1.06, 0.63   | 0.10     | 0.38      | -0.68, 0.87   | 1.14     | 0.59      | -0.07, 2.34   | 1.61         | 0.21        | 1.20, 2.03          | 0.016         | 0.005        | 0.006, 0.026          |
| High school diploma/GED            | 0.02     | 0.34      | -0.66, 0.71   | 0.16     | 0.26      | -0.36, 0.69   | 0.65     | 0.44      | -0.23, 1.53   | 1.27         | 0.18        | 0.91, 1.63          | 0.012         | 0.004        | 0.003, 0.021          |
| Some college                       | -0.18    | 0.32      | -0.83, 0.47   | -0.15    | 0.26      | -0.68, 0.39   | 0.68     | 0.38      | -0.08, 1.45   | 1.13         | 0.22        | 0.69, 1.57          | 0.010         | 0.005        | 0.001, 0.020          |
| BMI category                       |          |           |               |          |           |               |          |           |               |              |             |                     |               |              |                       |
| Overweight ( $\geq 25$ to $< 30$ ) | -0.62    | 0.34      | -1.30, 0.06   | -0.12    | 0.32      | -0.77, 0.52   | -0.19    | 0.42      | -1.03, 0.65   | 0.03         | 0.21        | -0.40, 0.47         | 0.002         | 0.004        | -0.007, 0.010         |
| Obese I ( $\geq 30$ to $< 35$ )    | 0.10     | 0.40      | -0.70, 0.90   | 0.29     | 0.36      | -0.43, 1.02   | 0.21     | 0.42      | -0.63, 1.06   | 0.53         | 0.24        | 0.05, 1.00          | 0.012         | 0.004        | 0.003, 0.020          |
| Obese II ( $\geq 35$ )             | 0.60     | 0.52      | -0.44, 1.65   | 1.15     | 0.39      | 0.37, 1.93    | 1.83     | 0.52      | 0.78, 2.89    | 1.57         | 0.26        | 1.05, 2.10          | 0.033         | 0.005        | 0.022, 0.044          |
| Smoking status                     |          |           |               |          |           |               |          |           |               |              |             |                     |               |              |                       |
| Current                            | 0.16     | 0.49      | -0.84, 1.15   | 0.69     | 0.33      | 0.02, 1.36    | 0.89     | 0.47      | -0.07, 1.85   | 7.36         | 0.28        | 6.80, 7.93          | 0.123         | 0.007        | 0.109, 0.137          |
| Former                             | 0.17     | 0.28      | -0.39, 0.73   | 0.00     | 0.23      | -0.47, 0.47   | 0.25     | 0.27      | -0.31, 0.80   | 1.98         | 0.14        | 1.69, 2.27          | 0.026         | 0.003        | 0.019, 0.033          |
| Alcohol use                        |          |           |               |          |           |               |          |           |               |              |             |                     |               |              |                       |
| 1-4 drinks per day                 | -0.08    | 0.26      | -0.60, 0.44   | -0.42    | 0.22      | -0.86, 0.03   | -0.08    | 0.34      | -0.77, 0.61   | -0.25        | 0.14        | -0.53, 0.04         | -0.006        | 0.004        | -0.013, 0.001         |
| 5+ drinks per day                  | 1.53     | 0.81      | -0.10, 3.16   | 0.52     | 0.66      | -0.82, 1.86   | 2.61     | 0.80      | 1.00, 4.22    | 1.36         | 0.54        | 0.27, 2.44          | 0.003         | 0.011        | -0.019, 0.025         |
| <i>N</i> = 3,475                   |          |           |               |          |           |               |          |           |               |              |             |                     |               |              |                       |

Note. PoAm = Pace of Aging methylation; *CI* = confidence interval. Bold font denotes statistically significant association following false discovery rate correction.

Table 8

Generalized linear models with strain with friends predicting epigenetic aging.

| Models                             | Horvath  |           |               | Hannum   |           |               | PhenoAge |           |               | GrimAge  |           |               | Dunedin PoAm |              |                     |
|------------------------------------|----------|-----------|---------------|----------|-----------|---------------|----------|-----------|---------------|----------|-----------|---------------|--------------|--------------|---------------------|
|                                    | <i>B</i> | <i>SE</i> | <i>95% CI</i> | <i>B</i> | <i>SE</i> | <i>95% CI</i> | <i>B</i> | <i>SE</i> | <i>95% CI</i> | <i>B</i> | <i>SE</i> | <i>95% CI</i> | <i>B</i>     | <i>SE</i>    | <i>95% CI</i>       |
| 1. Strain with friends             | 0.04     | 0.31      | -0.58, 0.66   | 0.16     | 0.23      | -0.30, 0.62   | -0.33    | 0.35      | -1.02, 0.37   | 0.43     | 0.20      | 0.02, 0.84    | <b>0.013</b> | <b>0.004</b> | <b>0.005, 0.021</b> |
| Age                                | 0.75     | 0.02      | 0.71, 0.78    | 0.79     | 0.01      | 0.76, 0.81    | 0.78     | 0.02      | 0.74, 0.81    | 0.78     | 0.01      | 0.76, 0.80    | 0.001        | 0.000        | 0.001, 0.001        |
| Female sex                         | -0.93    | 0.27      | -1.48, -0.38  | -1.80    | 0.22      | -2.25, -1.36  | -1.25    | 0.30      | -1.85, -0.65  | -3.33    | 0.21      | -3.74, -2.91  | -0.019       | 0.004        | -0.027, -0.012      |
| Race/ethnicity                     |          |           |               |          |           |               |          |           |               |          |           |               |              |              |                     |
| Non-Hispanic Black                 | 0.12     | 0.42      | -0.72, 0.96   | -1.70    | 0.33      | -2.36, -1.03  | 0.94     | 0.49      | -0.05, 1.94   | 1.93     | 0.24      | 1.45, 2.41    | 0.035        | 0.007        | 0.021, 0.048        |
| Hispanic                           | -1.27    | 0.44      | -2.15, -0.40  | 0.00     | 0.27      | -0.54, 0.53   | 0.02     | 0.35      | -0.69, 0.73   | 0.09     | 0.30      | -0.52, 0.69   | 0.007        | 0.007        | -0.007, 0.021       |
| Non-Hispanic other race            | 0.45     | 0.60      | -0.76, 1.66   | -0.57    | 0.61      | -1.80, 0.66   | 0.27     | 0.93      | -1.60, 2.14   | 0.42     | 0.41      | -0.41, 1.24   | 0.030        | 0.011        | 0.009, 0.051        |
| <i>N</i> = 3,473                   |          |           |               |          |           |               |          |           |               |          |           |               |              |              |                     |
| 2. Strain with friends             | -0.03    | 0.30      | -0.64, 0.58   | 0.04     | 0.21      | -0.40, 0.47   | -0.51    | 0.33      | -1.18, 0.16   | -0.09    | 0.16      | -0.42, 0.25   | 0.004        | 0.004        | -0.003, 0.012       |
| Age                                | 0.75     | 0.02      | 0.71, 0.79    | 0.79     | 0.01      | 0.77, 0.82    | 0.79     | 0.02      | 0.75, 0.82    | 0.80     | 0.01      | 0.79, 0.82    | 0.001        | 0.000        | 0.001, 0.002        |
| Female sex                         | -0.93    | 0.26      | -1.46, -0.39  | -1.85    | 0.23      | -2.31, -1.40  | -1.21    | 0.31      | -1.84, -0.59  | -3.05    | 0.18      | -3.42, -2.68  | -0.016       | 0.003        | -0.022, -0.010      |
| Race/ethnicity                     |          |           |               |          |           |               |          |           |               |          |           |               |              |              |                     |
| Non-Hispanic Black                 | 0.09     | 0.41      | -0.75, 0.92   | -1.86    | 0.35      | -2.58, -1.14  | 0.68     | 0.53      | -0.39, 1.75   | 1.45     | 0.22      | 1.00, 1.89    | 0.027        | 0.006        | 0.014, 0.040        |
| Hispanic                           | -1.24    | 0.45      | -2.14, -0.34  | -0.14    | 0.32      | -0.78, 0.51   | -0.43    | 0.44      | -1.32, 0.47   | -0.42    | 0.27      | -0.98, 0.13   | 0.001        | 0.007        | -0.014, 0.016       |
| Non-Hispanic other race            | 0.59     | 0.60      | -0.62, 1.80   | -0.53    | 0.62      | -1.78, 0.72   | 0.48     | 0.91      | -1.37, 2.32   | 0.89     | 0.34      | 0.20, 1.58    | 0.037        | 0.011        | 0.014, 0.059        |
| Educational attainment             |          |           |               |          |           |               |          |           |               |          |           |               |              |              |                     |
| Less than high school              | -0.13    | 0.41      | -0.96, 0.70   | 0.08     | 0.38      | -0.69, 0.86   | 1.16     | 0.58      | -0.01, 2.33   | 1.67     | 0.21      | 1.25, 2.09    | 0.017        | 0.005        | 0.006, 0.027        |
| High school diploma/GED            | 0.04     | 0.34      | -0.64, 0.73   | 0.15     | 0.26      | -0.38, 0.67   | 0.67     | 0.43      | -0.20, 1.55   | 1.31     | 0.18      | 0.95, 1.68    | 0.012        | 0.004        | 0.003, 0.021        |
| Some college                       | -0.17    | 0.33      | -0.83, 0.49   | -0.15    | 0.26      | -0.69, 0.38   | 0.68     | 0.38      | -0.09, 1.44   | 1.15     | 0.22      | 0.71, 1.59    | 0.011        | 0.005        | 0.001, 0.020        |
| BMI category                       |          |           |               |          |           |               |          |           |               |          |           |               |              |              |                     |
| Overweight ( $\geq 25$ to $< 30$ ) | -0.60    | 0.33      | -1.28, 0.07   | -0.13    | 0.32      | -0.77, 0.52   | -0.20    | 0.42      | -1.04, 0.64   | 0.05     | 0.21      | -0.38, 0.48   | 0.002        | 0.004        | -0.007, 0.011       |
| Obese I ( $\geq 30$ to $< 35$ )    | 0.12     | 0.40      | -0.69, 0.92   | 0.28     | 0.35      | -0.43, 1.00   | 0.22     | 0.42      | -0.63, 1.06   | 0.55     | 0.23      | 0.08, 1.03    | 0.012        | 0.004        | 0.004, 0.020        |
| Obese II ( $\geq 35$ )             | 0.71     | 0.51      | -0.31, 1.74   | 1.15     | 0.38      | 0.39, 1.91    | 1.86     | 0.52      | 0.81, 2.91    | 1.64     | 0.26      | 1.12, 2.16    | 0.033        | 0.005        | 0.022, 0.044        |
| Smoking status                     |          |           |               |          |           |               |          |           |               |          |           |               |              |              |                     |
| Current                            | 0.14     | 0.49      | -0.86, 1.14   | 0.68     | 0.32      | 0.03, 1.33    | 0.96     | 0.47      | 0.01, 1.91    | 7.37     | 0.28      | 6.79, 7.94    | 0.122        | 0.007        | 0.108, 0.136        |
| Former                             | 0.14     | 0.28      | -0.42, 0.71   | 0.00     | 0.23      | -0.47, 0.47   | 0.25     | 0.27      | -0.30, 0.81   | 1.97     | 0.14      | 1.68, 2.26    | 0.026        | 0.003        | 0.019, 0.032        |
| Alcohol use                        |          |           |               |          |           |               |          |           |               |          |           |               |              |              |                     |
| 1-4 drinks per day                 | -0.08    | 0.26      | -0.61, 0.44   | -0.41    | 0.22      | -0.86, 0.04   | -0.09    | 0.34      | -0.77, 0.59   | -0.25    | 0.14      | -0.54, 0.03   | -0.006       | 0.004        | -0.013, 0.001       |
| 5+ drinks per day                  | 1.52     | 0.80      | -0.10, 3.14   | 0.52     | 0.66      | -0.82, 1.87   | 2.58     | 0.79      | 0.98, 4.19    | 1.34     | 0.55      | 0.24, 2.44    | 0.003        | 0.011        | -0.019, 0.025       |
| <i>N</i> = 3,473                   |          |           |               |          |           |               |          |           |               |          |           |               |              |              |                     |

Note. PoAm = Pace of Aging methylation; *CI* = confidence interval. Bold font denotes statistically significant association following false discovery rate correction.
